1 **Reproducibility and repeatability of six high-throughput 16S rDNA sequencing**  
2 **protocols for microbiota profiling.**

3 **Authors:**

4 Sajan C. Raju<sup>1,2</sup>, sajan.raju@helsinki.fi

5 Sonja Lagström<sup>3</sup>, sonja.lagstrom@krefregisteret.no

6 Pekka Ellonen<sup>3</sup>, pekka.ellonen@helsinki.fi

7 Willem M. de Vos<sup>4,5</sup>, willem.devos@wur.nl

8 Johan G. Eriksson<sup>1,6,7</sup>, johan.eriksson@helsinki.fi

9 Elisabete Weiderpass<sup>1,2,8,9,10</sup>, Elisabete.Weiderpass@ki.se

10 Trine B. Rounge<sup>\*1,2,8</sup>, trine.rounge@krefregisteret.no

11 **Affiliations:**

12 <sup>1</sup> Folkhälsan Research Center, Helsinki, Finland,

13 <sup>2</sup> Faculty of Medicine, University of Helsinki, Helsinki, Finland.

14 <sup>3</sup> Institute for Molecular Medicine Finland (FIMM), University of Helsinki, Helsinki, Finland

15 <sup>4</sup> RPU Immunobiology, Department of Bacteriology and Immunology, University of Helsinki,  
16 Helsinki, Finland

17 <sup>5</sup> Laboratory of Microbiology, Wageningen University, Wageningen, The Netherlands

18 <sup>6</sup> Department of General Practice and Primary Health Care, University of Helsinki and Helsinki  
19 University Hospital, Helsinki, Finland

20 <sup>7</sup> Department of Chronic Disease Prevention, National Institute for Health and Welfare, Helsinki,  
21 Finland

22 <sup>8</sup> Department of Research, Cancer Registry of Norway, Institute of Population-based Cancer  
23 Research, Oslo, Norway

24 <sup>9</sup> Department of Medical Epidemiology and Biostatistics, Karolinska Institutet, Stockholm, Sweden

25 <sup>10</sup> Department of Community Medicine, Faculty of Health Sciences, University of Tromsø, The  
26 Arctic University of Norway, Tromsø, Norway.

27

28 **Corresponding author:**

29 Dr. Trine B. Rounge

30 Folkhälsan Research Center

31 Biomedicum 1

32 P.O. Box 63 (Haartmansgatan 8)

33 00014 University of Helsinki, Finland

34 E-mail address: trine.rounge@krefregisteret.no

35 Phone: +47 99604304, Fax number: +358 2941 25382

36

37 Running title: Reproducibility of saliva microbiota

38

39

40

41

42 **Abstract**

43 Culture-independent molecular techniques and advances in next generation sequencing (NGS)  
44 technologies make large-scale epidemiological studies on microbiota feasible. A challenge using  
45 NGS is to obtain high reproducibility and repeatability, which is mostly attained through robust  
46 amplification. We aimed to assess the reproducibility of saliva microbiota by comparing triplicate  
47 samples. The microbiota was produced with simplified in-house 16S amplicon assays taking  
48 advantage of large number of barcodes. The assays included primers with Truseq (TS-tailed) or  
49 Nextera (NX-tailed) adapters and either with dual index or dual index plus a 6-nt internal index. All  
50 amplification protocols produced consistent microbial profiles for the same samples. Although, in  
51 our study, reproducibility was highest for the TS-tailed method. Five replicates of a single sample,  
52 prepared with the TS-tailed 1-step protocol without internal index sequenced on the HiSeq platform  
53 provided high alpha-diversity and low standard deviation (mean Shannon and Inverse Simpson  
54 diversity was  $3.19 \pm 0.097$  and  $13.56 \pm 1.634$  respectively). Large-scale profiling of microbiota can  
55 consistently be produced by all 16S amplicon assays. The TS-tailed-1S dual index protocol is  
56 preferred since it provides repeatable profiles on the HiSeq platform and are less labour intensive.

57

58

59

60

61

62

## 63 **Introduction**

64 Presently, there is rising interest in studying human microbiota using high throughput approaches  
65 based on 16S rRNA gene sequences. This gene is as a highly abundant, evolutionary conserved and  
66 phylogenetically informative housekeeping genetic marker (Lane et al., 1985; Tringe and  
67 Hugenholtz, 2008; Zheng et al., 2015). The composition and diversity of the human microbiota  
68 have been correlated to health and disease, although only few cases of causal relationships have  
69 been uncovered (Cho and Blaser, 2012; Human Microbiome Project Consortium, 2012; Nicholson  
70 et al., 2012; Scheithauer et al., 2016; van Nood et al., 2013).

71 While attention has focused on the intestinal microbiota, it is well known that the oral cavity also  
72 harbours a large microbial community that includes around 700 common bacterial species, out of  
73 which 35% are still unculturable (Dewhirst et al., 2010). Cultivation-independent molecular  
74 methods have validated these estimates, by identifying approximately 600 species or phylotypes  
75 using 16S rRNA gene sequencing techniques (Dewhirst et al., 2010; Paster et al., 2001). Oral  
76 bacteria have been linked to many oral diseases and non-oral diseases, testifying for their  
77 importance (Krishnan et al., 2017). While metagenomic studies have provided insight in the large  
78 coding capacity of the human microbiota (Li et al., 2014; Qin et al., 2010), taxonomic studies  
79 mainly rely on amplifying and analysing hypervariable regions of 16S rRNA gene sequences.

80 It is known that a precise assessment of the microbiota depends heavily on the hypervariable  
81 region selected, and primers used, whereas taxonomic resolution bias can arise with amplification  
82 of non-representative genomic regions (Wen et al., 2017; Zheng et al., 2015). Next generation  
83 sequencing (NGS) technology with application of barcode indexing are possible to achieve  
84 thousands of sequences from large number of samples simultaneously (Andersson et al., 2008;  
85 Hamady et al., 2008). However, reproducible identification and consistent quantification of  
86 bacterial profiles remain challenging (Ding and Schloss, 2014). Studies have shown that  $\beta$ -diversity  
87 metrics depicted significant correlation between oral bacterial composition for the V1–V3 and V3–

88 V4 regions (Zheng et al., 2015). The 16S rRNA V3-V4 hypervariable region is widely used for  
89 various microbiological studies (Belstrøm et al., 2016; Fadrosh et al., 2014; Janem et al., 2017).  
90 Protocols have been developed using the dual indexing strategy to yield the greater utilization of  
91 available sequencing capacity (Kozich et al., 2013). High throughput and cost effective sequencing  
92 approaches are continuously being developed, urging researchers to use the latest technologies while  
93 abandoning the old ones. However, evaluation of new methodologies is a crucial step in conducting  
94 rigorous scientific research (Sinclair et al., 2015). This specifically applies to generating  
95 representative libraries of 16S rRNA gene amplicons.  
96 In this study, we aimed to simplify amplification procedure and investigate barcoding efficacy with  
97 internal indices, for sequencing 16S rRNA gene amplicons relative to sequencing quality, depth,  
98 reproducibility and repeatability. Specifically, we tested high-throughput workflows for amplicon  
99 library construction of the 16S rRNA V3–V4 hypervariable region using Truseq and Nextera  
100 adapters with dual index and dual index plus 6-nt internal index. We assessed the reproducibility of  
101 the saliva microbiota for four saliva samples in triplicates using the Illumina MiSeq platform and  
102 the repeatability using nine control samples, including five replicates from a single individual, with  
103 the 1-step TS-tailed dual index protocol on the Illumina HiSeq platform.

## 104 **Materials and Methods**

105 Saliva samples in triplicates from four volunteers were selected for this study (Fig. 1). The study  
106 was approved by the regional Ethics Committee of the Hospital District of Helsinki and Uusimaa  
107 (169/13/03/00/10). The saliva samples were collected in Oragene-DNA (OG-500) self-collection  
108 kits (DNA Genotek Inc, Canada) and mixed with stabilizing reagent within the collection tubes per  
109 manufacturer's instructions by participants, and stored at room temperature. A protocol with an  
110 intensive lysis step using a cocktail of lysozyme and mechanical disruption of microbial cells using  
111 bead-beating was employed. Fifty ml lysozyme (10 mg/ml, Sigma-Aldrich), 6 ml mutanolysin (25  
112 KU/ml, Sigma-Aldrich), and 3 ml lysostaphin (4000 U/ml, Sigma-Aldrich) were added to a 500 ml

113 aliquot of cell suspension followed by incubation for 1 h at 37 °C. Subsequently, 600 mg of 0.1-  
114 mm-diameter zirconia/silica beads (BioSpec, Bartlesville, OK) were added to the lysate and the  
115 microbial cells were mechanically disrupted using Mini-BeadBeater-96 (BioSpec, Bartlesville, OK)  
116 at 2100 rpm for 1 min (Yuan et al., 2012). After lysis, total DNA was extracted using cmg-1035  
117 saliva kit, and Chemagic MSM1 nucleic acid extraction robot (PerkinElmer).

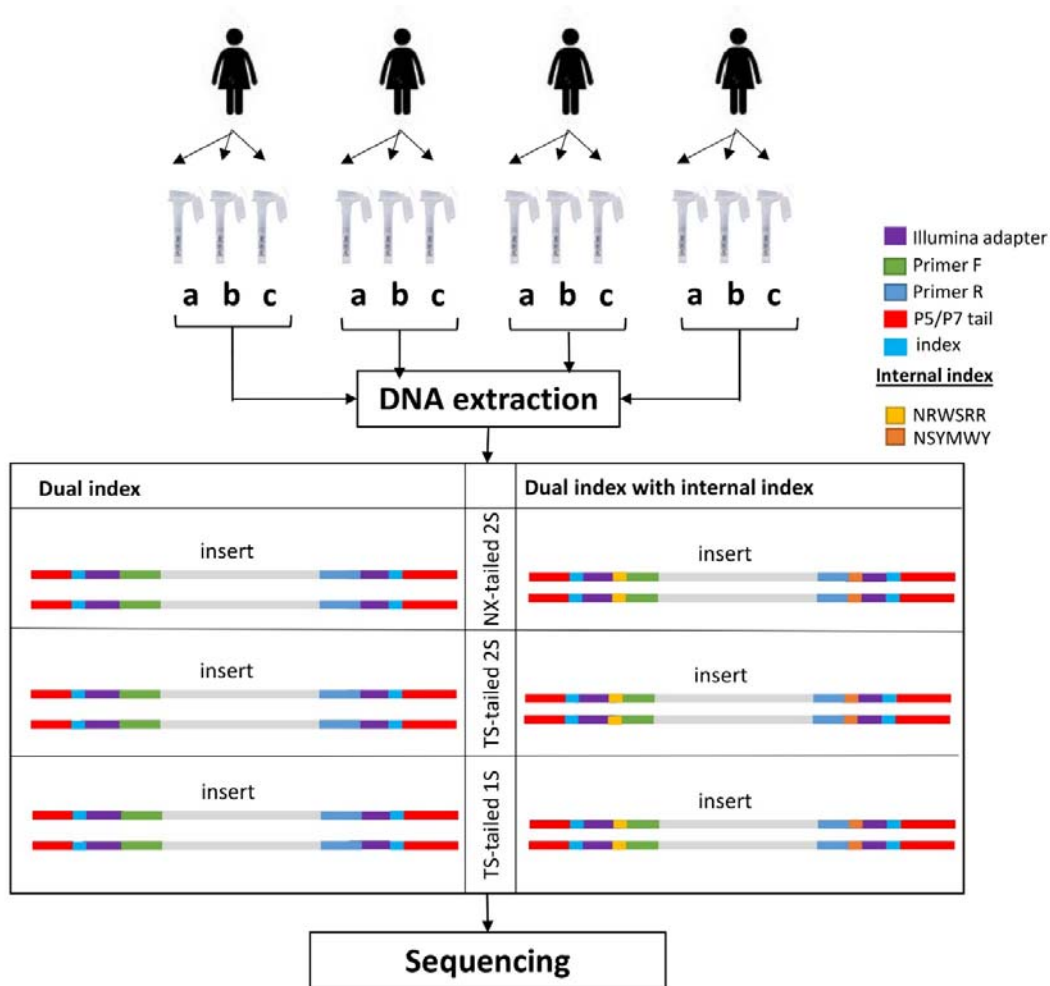

118

### 119 Fig. 1. Study Design

120 Schematic presentation of the study design showing the number of participants and different  
121 methods implemented.

### 122 PCR amplification

123 PCR amplification and sequencing libraries was prepared according to in-house 16S rRNA gene-  
124 based PCR amplification protocols. All protocols used 16S primers (S-D-Bact-0341-b-S-17: 5'  
125 CCTACGGGNGGCWGCAG '3 and S-D-Bact-0785-a-A-21: 5'  
126 GACTACHVGGGTATCTAATCC 3') targeting the V3-V4 region as reported previously  
127 (Klindworth et al., 2013). The 16S rRNA gene-based primers were modified by adding 5' tails  
128 corresponding to the Illumina Truseq and Nextera adapter sequences to the 5'-ends. Amplification  
129 was done using primers with and without incorporated internal index (Supplementary Table S1).  
130 Two sets of index primers carrying Illumina grafting P5/P7 sequence were used: in-house index  
131 primers with Truseq adapter sequence (Supplementary Table S2) and Illumina Nextera i5/i7  
132 adapters. All oligonucleotides (except Illumina Nextera i5/i7 adapters) were synthesized by Sigma-  
133 Aldrich (St. Louis, MO, USA).

#### 134 ***TS-tailed 1-step amplification***

135 Amplification was performed in 20 µl containing 1 µl of template DNA, 10 µl of 2x Phusion High-  
136 Fidelity PCR Master Mix (Thermo Scientific Inc., Waltham, MA, USA), 0,25 µM of each 16S  
137 primer carrying Truseq adapter, 0,5 µM of each Truseq index primer. The cycling conditions were  
138 as follows: initial denaturation at 98 °C for 30 seconds; 27 cycles at 98 °C for 10 sec, at 62 °C for  
139 30 sec and at 72 °C for 15 sec; final extension at 72 °C for 10 min, followed by a hold at 10 °C.  
140 Separate reactions were done using 16S rRNA gene-based primers with and without incorporated  
141 internal index (denoted as ii). Here after this protocol denoted as TS-tailed-1S.

#### 142 ***TS-tailed 2-step amplification***

143 Amplification was performed in 20 µl containing 1 µl of template DNA, 10 µl of 2x Phusion High-  
144 Fidelity PCR Master Mix (Thermo Scientific Inc., Waltham, MA, USA), 0,5 µM of each 16S  
145 primer carrying Truseq adapter. The cycling conditions were as follows: initial denaturation at 98  
146 °C for 30 sec; 27 cycles at 98 °C for 10 sec, at 62 °C for 30 sec and at 72 °C for 15 sec; final

147 extension at 72 °C for 10 min, followed by a hold at 10 °C. Separate reactions were done using 16S  
148 rRNA gene-based primers with and without incorporated internal index. Following PCR  
149 amplification, samples were purified using a Performa V3 96-Well Short Plate (Edge BioSystems,  
150 Gaithersburg, MD, USA) and QuickStep 2 SOPE Resin (Edge BioSystems, Gaithersburg, MD,  
151 USA) according to the manufacturer's instructions. An additional PCR step was needed to add  
152 index sequences to the PCR product. Amplification was performed in 20 µl containing 1 µl of  
153 diluted (1:100) PCR product, 10 µl of 2x Phusion High-Fidelity PCR Master Mix (Thermo  
154 Scientific Inc., Waltham, MA, USA), 0,5 µM of each Truseq index primer. The cycling conditions  
155 were as follows: initial denaturation at 98 °C for 2 min; 12 cycles at 98 °C for 20 sec, at 65 °C for  
156 30 sec and at 72 °C for 30 sec; final extension at 72 °C for 5 min, followed by a hold at 10 °C. Here  
157 after this protocol denoted as TS-tailed-2S.

#### 158 ***NX-tailed 2-step amplification***

159 Amplification was performed in 20 µl containing 1 µl of template DNA, 10 µl of 2x Phusion High-  
160 Fidelity PCR Master Mix (Thermo Scientific Inc., Waltham, MA, USA), 0.5 µM of each of the 16S  
161 rRNA gene-based primers carrying Nextera adapters. The cycling conditions were as follows: initial  
162 denaturation at 98 °C for 30 sec; 27 cycles at 98 °C for 10 seconds, at 62 °C for 30 sec and at 72 °C  
163 for 15 sec; final extension at 72 °C for 10 min, followed by a hold at 10 °C. Separate reactions were  
164 done using 16S rRNA gene-based primers with and without incorporated internal index. Following  
165 PCR amplification, samples were purified using a Performa V3 96-Well Short Plate (Edge  
166 BioSystems, Gaithersburg, MD, USA) and QuickStep 2 SOPE Resin (Edge BioSystems,  
167 Gaithersburg, MD, USA) according to the manufacturer's instructions. An additional PCR step was  
168 needed to add index sequences to the PCR product. Amplification was performed according to  
169 Illumina Nextera protocol to amplify tagmented DNA with following exceptions: i) reaction volume  
170 was downscaled to 20 µl, ii) 1 µl of diluted (1:100) PCR product was used as template, and iii)



171 reaction mix was brought to the final volume with laboratory grade water. Here after this protocol  
172 denoted as NX-tailed-2S.

### 173 ***Pooling, purification and quantification***

174 Following PCR amplifications, libraries were pooled in equal volumes. Library pool was purified  
175 twice with Agencourt® AMPure® XP (Beckman Coulter, Brea, CA, USA) according to the  
176 manufacturer's instructions using equal volumes of the Agencourt® AMPure® XP and the library  
177 pool. The purified library pool was analyzed on Agilent 2100 Bioanalyzer using Agilent High  
178 Sensitivity DNA Kit (Agilent Technologies Inc., Santa Clara, CA, USA) to quantify amplification  
179 performance and yield.

### 180 ***Sequencing***

181 Sequencing of PCR amplicons was performed using the Illumina MiSeq instrument (Illumina, Inc.,  
182 San Diego, CA, USA). Samples were sequenced as 251x 2 bp paired-end reads and two 8-bp index  
183 reads. DNA extracted from nine blank samples, two water samples and nine control saliva samples  
184 (in which 5 samples are replicates of sample 4c) using the above mentioned protocol and amplified  
185 with TS-tailed 1S protocol without internal index, and sequencing performed (271 x 2 bp) using the  
186 Illumina HiSeq instrument.

### 187 **Phylogenetic Analysis.**

188 Sequencing quality, index trimming and length filtering was carried out using Neson clip Version  
189 0.130 (<https://github.com/Victorian-Bioinformatics-Consortium/nesoni>). Resulting sequences were  
190 processed using MiSeq\_SOP in mothur (Version v.1.35.1) (Schloss et al., 2009) and sequences  
191 were aligned to ribosomal reference database arb-SILVA Version V119 (Quast et al., 2012). We  
192 used both SILVA database and the Human Oral Microbiome Database (HOMD) database for the  
193 alignment and classification of sequences but present here only the results from the SILVA database  
194 and taxonomy as it provides comprehensive, quality checked and regularly updated databases of

195 aligned small (16S / 18S, SSU) and large subunits (Quast et al., 2012). To obtain high quality data  
196 for analysis, sequence reads containing ambiguous bases, homopolymers > 8 bp, more than one  
197 mismatch in the primer sequence, or less than default quality score in mothur were removed.  
198 Assembled sequences with > 460 bp length and singletons were removed from the analysis.  
199 Chimeric sequences were also removed from the data set using the UCHIME algorithm within the  
200 mothur pipeline (Edgar et al., 2011). The high-quality sequence reads were aligned to the Silva 16S  
201 rRNA database (Version V119) and clustered into operational taxonomic units (OTUs) at a cut-off  
202 value > 98% sequence similarity. OTUs were classified using the Silva bacteria taxonomy  
203 reference. OTUs were calculated at distance 0.02 and alpha diversity (Shannon and inverse  
204 Simpson index) was calculated per sample. These diversity indexes are shown to be a robust  
205 estimation of microbial diversity (Haegeman et al., 2013).

206 **Statistic procedures.** Microbial diversity indices, both Shannon and Inverse Simpson, were used to  
207 summarize the diversity of a population. Simpson's index is more weighted on dominant species  
208 whereas Shannon index assumes all species are represented in a sample and that they are randomly  
209 sampled (Lozupone and Knight, 2008). Kruskal-Wallis (KW-test) test was performed on the alpha  
210 diversity indices to assess the statistical significance difference between microbial diversity and the  
211 methods used. Principal coordinate analysis (PCoA) plotted with bray-curtis distance without  
212 normalizing the data using biom formatted OTUs from mothur to the phyloseq R-package Ver  
213 1.22.3 (McMurdie and Holmes, 2014). Intraclass correlation coefficients (ICC) to quantify the  
214 reproducibility, stability, and accuracy or neutrality of different protocol for six metrics included  
215 relative abundances of four major phyla (Actinobacteria, Bacteroidetes, Firmicutes and  
216 Proteobacteria) and two alpha diversity indices (Shannon & Inverse Simpson index). The ICCs  
217 were estimated using the SPSS (version 22) based on the mixed effects model (Sinha et al., 2016).  
218 All the graphics and plots were made in R using ggplot2 package (Wilkinson, 2011).

## 219 **Results**

220 **16S rRNA sequencing**

221 Saliva microbiota sequence data of the 16S rRNA V3-V4 region for 4 individuals in triplicates  
 222 using TS-tailed and NX-tailed amplification, with and without internal index, were collected on the  
 223 Illumina MiSeq platform (Table 1).

224 **Table 1:** Sequencing statistics, quality check passed sequences and sequences classified for samples  
 225 (combined for methods used) sequenced in MiSeq and HiSeq platform.

| #samples | Protocol         | Total sequences | Reads/sample |        |        | QC passed sequences | #Sequences classified | % of sequences |
|----------|------------------|-----------------|--------------|--------|--------|---------------------|-----------------------|----------------|
|          |                  |                 | (Min)        | (Max)  | (Mean) |                     |                       |                |
| 12       | NX-tailed-2S     | 56032           | 2273         | 6480   | 4669   | 52070               | 34332                 | 61.27          |
| 12       | NX-tailed-2S ii* | 64791           | 2452         | 10192  | 5399   | 55407               | 24836                 | 38.33          |
| 12       | TS-tailed-2S     | 115736          | 6940         | 15161  | 9644   | 100788              | 69783                 | 60.29          |
| 12       | TS-tailed-2S ii  | 142880          | 8048         | 16271  | 11906  | 121134              | 66014                 | 46.20          |
| 12       | TS-tailed-1S     | 96252           | 733          | 10868  | 8021   | 79339               | 56761                 | 58.97          |
| 12       | TS-tailed-1S ii  | 123165          | 2187         | 14519  | 10263  | 89631               | 48479                 | 39.36          |
| 9        | TS-tailed-1S **  | 1228989         | 48100        | 398420 | 136554 | 974702              | 711088                | 57.86          |

226 \* Internal indices, \*\* Control samples sequenced on the HiSeq platform  
 227

228 Two control water samples, nine saliva control samples (including 5 replicates) and blank samples  
 229 using TS-tailed 1S protocol without internal index, were sequenced on the Illumina HiSeq platform.  
 230 Samples sequenced using TS-tailed 1S and 2S protocol with and without internal index generated  
 231 comparatively higher amounts of sequence reads. This was true also after trimming of low-quality  
 232 sequences (Fig. 2 and Supplementary table S3). The sequences were clustered and assigned to 1086  
 233 OTUs. Sequence coverage and percentage of sequences passed quality check from each protocol  
 234 and qualified for taxonomic classification are summarized in Table 1.

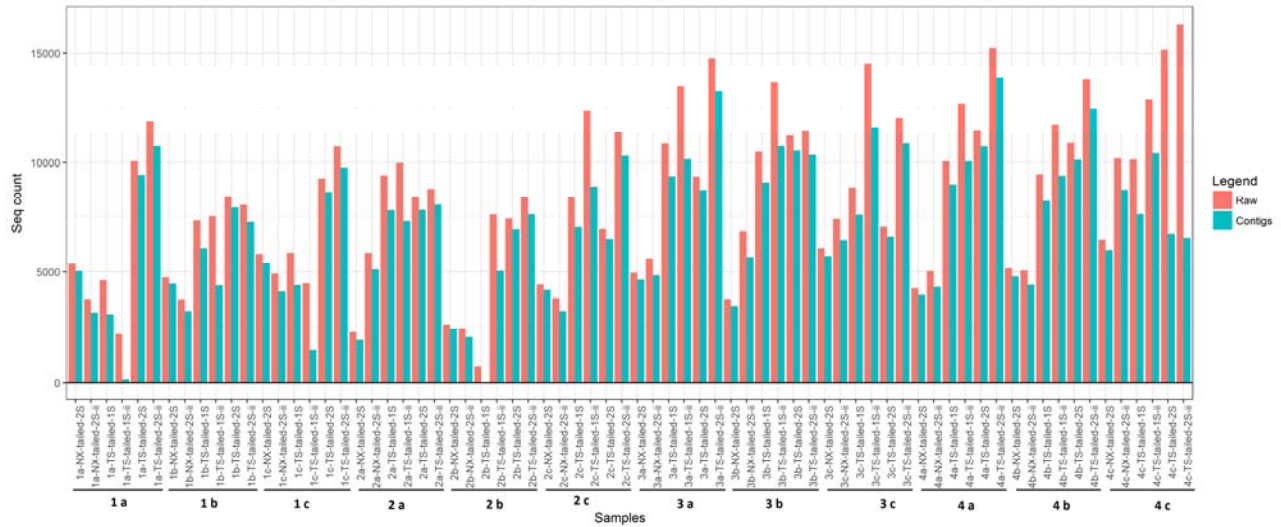

**Fig. 2: Sequence data filtering.**

Distribution of sequences before (Raw data count in blue colour) and after (contigs count in red colour) quality check and assembly for the saliva microbiota sequenced in MiSeq platform.

The protocols with the internal index approach showed consistently 14-23 % lower OTU's per sample for all protocol. About 61% of saliva microbiota sequences remained after quality check using NX-tailed protocol without internal index, while only 38% remained using NX-tailed protocol with internal index. In our study, the NX-tailed protocol produced slightly less sequences than the TS-tailed protocols, with 4669 and 5399 mean reads per sample respectively. About 60% of saliva microbiota passed the quality check in TS-tailed without internal index and produced in our protocol more than 8000 reads per sample. Principle coordinate analysis (PCoA) using Bray-Curtis distance, to visualize broad trends of how similar or different bacteria are between triplicate samples, shows that samples cluster according to the individual (Fig. 3).

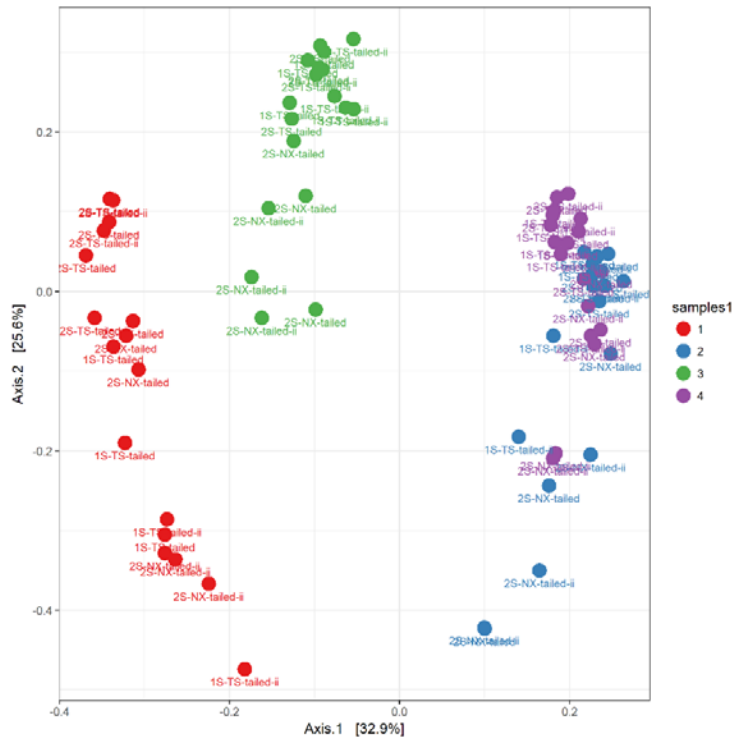

249

250 **Fig. 3: Principal coordinate analysis (PCoA) plot**

251 PCoA plot, based on the bray-curtis distances. The percentage of the total variance explained by  
252 each PC is indicated in parentheses.

253

254 ***Alpha diversity of saliva microbiota is similar for all the protocols***

255 The Shannon diversity and inverse Simpson indices used to calculate the alpha diversity showed  
256 similar diversity for each sample irrespective of the protocols used with exception of few outliers  
257 (Fig. 4 a and b). The outliers are the samples with low diversity and low sequence depth, < 4000  
258 sequences. Though Shannon diversity index showed less variation according to the sequence depth  
259 compared to inverse-Simpson index, we did not find any significant relationship (KW-test) between  
260 the diversity indices and the protocols used.

261

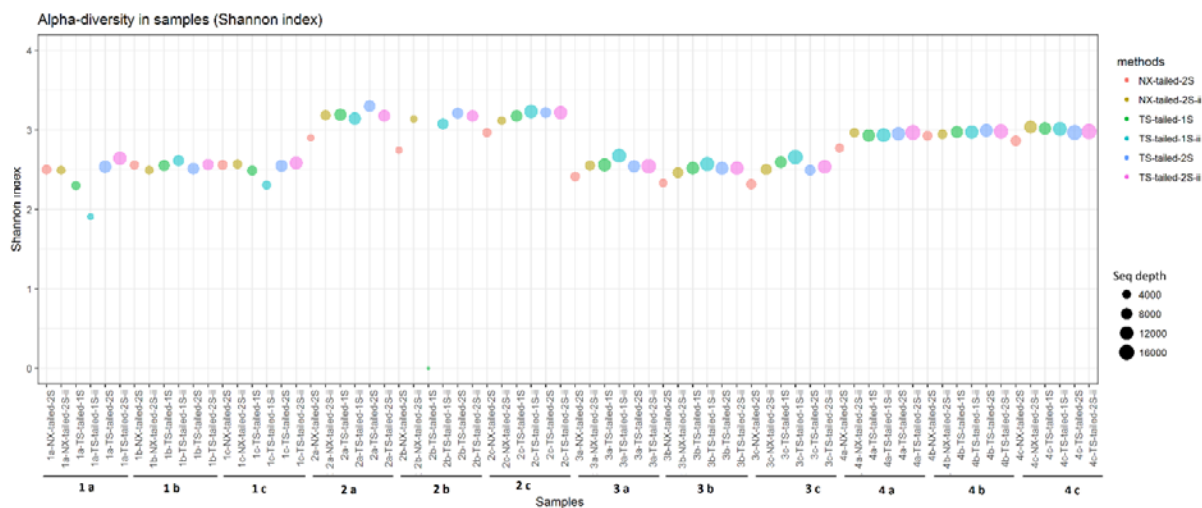

262

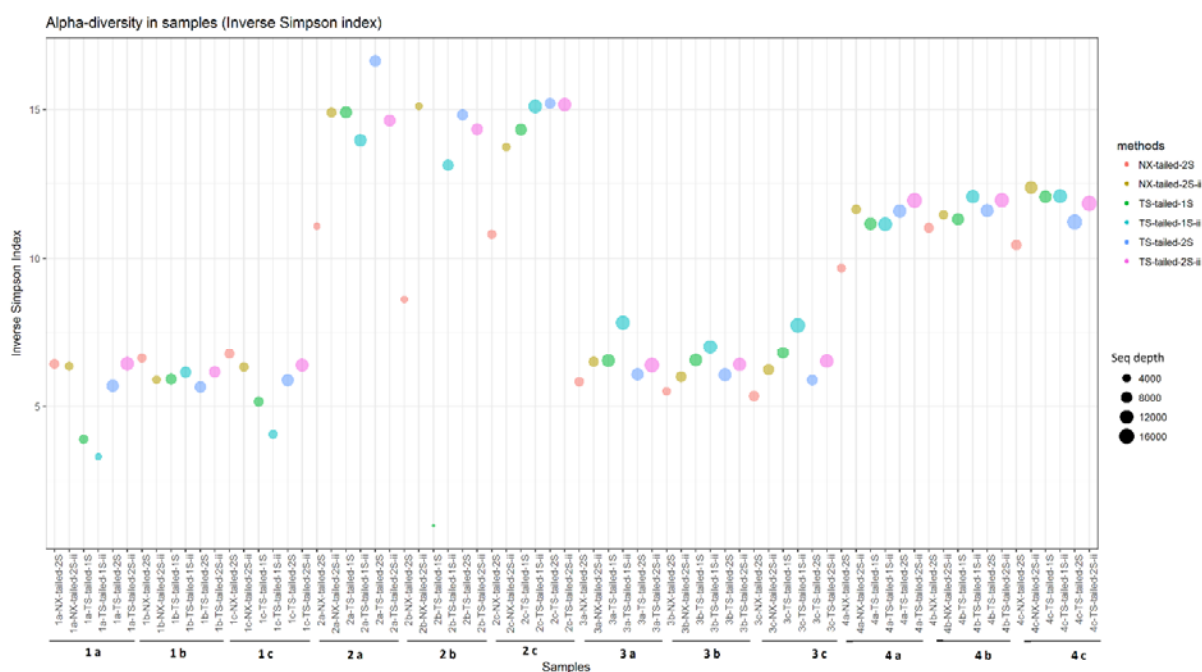

263

264 **Fig. 4 a & b: Microbial diversity in saliva**

265 Alpha diversity measured using Shannon (a) and Inverse Simpson (b) index in each replicates.

266 Bubble size depicts the sequence depth and bubble colour is Illumina method used.

267 ***Consistent occurrence of bacterial abundance within the protocols***

268 Taxonomic composition of saliva microbiota from four samples with different amplification

269 protocols with and without internal index showed sample specific composition profile at two

270 taxonomic levels. The bacterial relative abundance at phylum level was measured using the top five  
271 abundant phyla; Actinobacteria, Bacteroidetes, Firmicutes, Fusobacteria and Proteobacteria (Fig. 5).

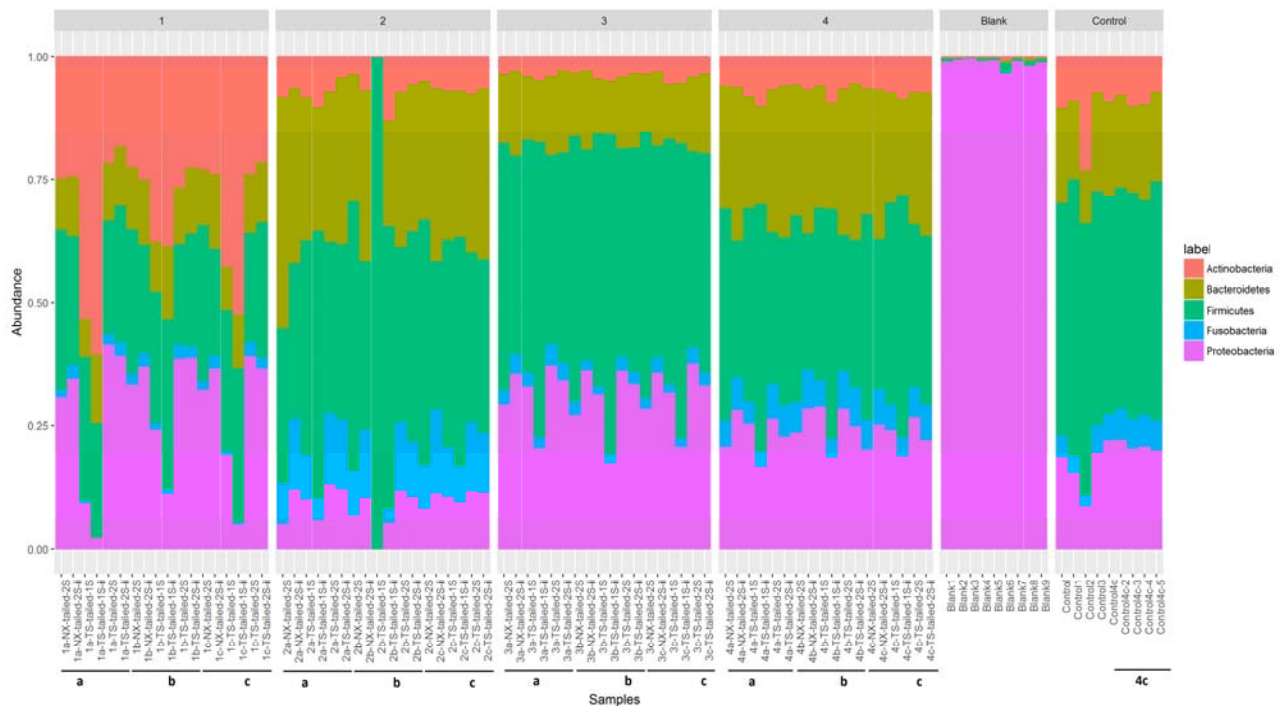

272  
273 **Fig. 5: Phylum abundance**

274 Composition of abundant phylum in each sample separated by individuals. Phylum composition of  
275 blank and control samples were also included in the figure as separate samples. Samples with low  
276 sequence depth are marked in red coloured box.

277 Similar patterns of phyla abundance were observed for the samples from same individuals using the  
278 different protocols. However, detailed comparison of the phyla abundance showed that the oral  
279 microbiota of individual 1 included a high abundance of Actinobacteria, Proteobacteria and  
280 Firmicutes, that of individual 2 included mainly Firmicutes and Bacteroidetes, whereas that of  
281 individuals 3 and 4 included mainly Firmicutes, Bacteroidetes and Proteobacteria. Sample 2b from  
282 individual 2 which was sequenced using the TS-tailed 1S protocol without internal index was an  
283 outlier with only 733 sequences. The relative abundance at the bacterial genus level was measured  
284 using the top 30 abundant genera (Supplementary Figure. S4). Similar patterns of genus abundance



285 were also observed for the samples from same individuals using the different protocols. However,  
286 these compositions differed between the individuals in line with the differences at the phylum level  
287 (Fig. 5).

### 288 ***Reproducibility and stability of the protocols***

289 Average Shannon diversity for sample 1 was comparatively similar except for the TS-tailed 1S  
290 protocol with internal index. In sample 2, NX-tailed 2S and TS-tailed 1S without internal indices  
291 protocol yielded comparatively less Shannon diversity. Where as in sample 3 and sample 4 Shannon  
292 diversity was comparatively similar for all the protocols. Average Inverse Simpson diversity was  
293 comparatively less, using NX-tailed 2S protocol for sample 2, 3 and 4, TS-tailed 1S protocol for  
294 sample 1, TS-tailed 1S protocol in sample 1 and 2, and, TS-tailed 1S protocol with internal index  
295 for sample 1 (Supplementary Table S5). Intra-class correlation coefficients (ICC) used to enumerate  
296 the reproducibility and stability of different protocols for six metrics included relative abundances  
297 of four top abundant phyla and two alpha diversity indices showed comparatively better  
298 reproducibility and stability with TS-tailed 2S protocol with and without internal index (Fig. 6).

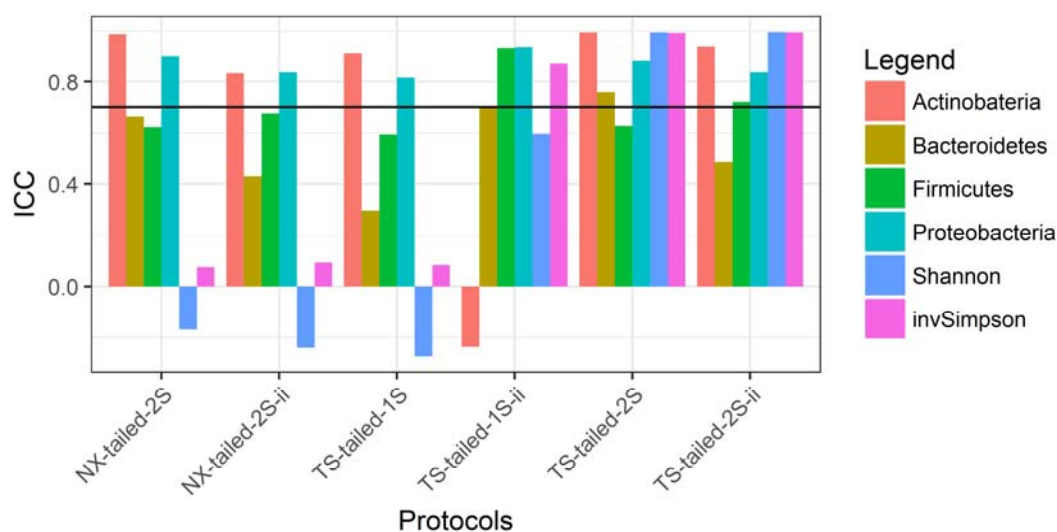

299

300 **Fig. 6: Reproducibility and stability of the protocols**



301 Intra-class correlation coefficient plotted for six metrics included relative abundances of four major  
302 phyla (Actinobacteria, Bacteroidetes, Firmicutes and Proteobacteria) and two alpha diversity indices  
303 (Shannon & Inverse Simpson index).

304

305 Actinobacteria from TS-tailed 1S protocol with internal indices, and Shannon index from TS-tailed  
306 1S, NX-tailed protocol, and NX-tailed protocol with internal index showed negative ICC.

### 307 ***Repeatability of the saliva microbiota with TS-tailed 1S protocol***

308 Repeatability of the saliva microbiota using the TS-tailed 1S protocol, which give the  
309 reproducibility and stability, were tested with nine control samples in HiSeq Illumina platform. We  
310 also amplified and sequenced negative controls; nine blank samples and two water samples to  
311 identify reagents and laboratory contamination. HiSeq platform provided 28936 mean sequences  
312 data for nine blank samples, 136554 sequences for nine control samples and 790 mean sequences  
313 for water samples. The result showed low diversity for blank samples sequenced and high diversity  
314 for the control samples (Fig. 7). None of the sequences from the water samples could be assembled.  
315 Mean Shannon diversity was 0.374 and 3.15 and standard deviation (SD) of 0.122 and 0.097, for  
316 blank and control samples respectively. Whereas mean inverse Simpson diversity was 1.177 and  
317 13.460 and SD of 0.097 and 1.634, for blank and control samples respectively. Two abundant  
318 OTUs from the blank samples were explicitly assigned to two genera of the Proteobacteria phylum,  
319 *Pseudomonas* and *Achromobacter*. Bacterial relative abundance of control samples at phyla level  
320 shows high abundant of phyla Firmicutes, Bacteroidetes and Proteobacteria (Fig. 5). Relative  
321 abundance of bacteria at genus level showed that the control samples were enriched in *Veillonella*,  
322 *Prevotella*, *Rothia*, *Neisseria* and *Fusobacterium* spp. (Supplementary Figure. S4).

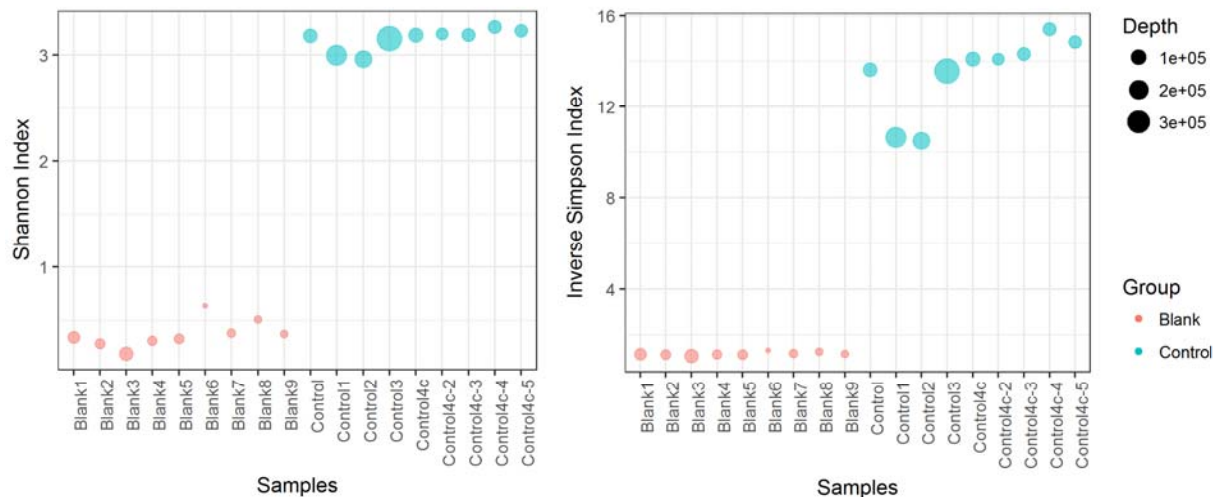

323

324 **Fig. 7 a & b: Microbial diversity in blank and control samples**

325 Alpha diversity measured using Shannon (7a) and Inverse Simpson (7b) index in blank and  
326 samples data from HiSeq platform.

## 327 Discussion

328 Several studies have successfully used the Illumina technology approaches for 16S rRNA gene  
329 amplicon sequencing on diverse sample types (Bartram et al., 2011; Caporaso et al., 2012; Claesson  
330 et al., 2010; Degnan and Ochman, 2012; Fadrosch et al., 2014; Gloor et al., 2010; Kozich et al.,  
331 2013; Sinclair et al., 2015; Zhou et al., 2011). However, protocols differ in extraction methods,  
332 primers, chemistry and sequencing length between studies and a gold standard has not been  
333 established. In this study, we compared the reproducibility of six Illumina technology based  
334 amplification protocols on saliva samples with primers that were modified in-house (Klindworth et  
335 al., 2013; Yuan et al., 2012). We aimed to simplify amplification procedure, investigate barcoding  
336 efficacy and expand the number of available barcodes to make 16S assays feasible to run large  
337 sample sets on the HiSeq platform.

338 Cells may vary in their susceptibility to lysing methods. Various studies have shown that  
339 mechanical lysis gives highest bacterial diversity in 16S rRNA gene based studies, notably when  
340 communities carry hard to lyse Gram-positive bacteria, such as in faecal samples (Robinson et al.,  
341 2016; Salonen et al., 2010; Santiago et al., 2014; Yuan et al., 2012). However, oral samples  
342 extracted using either mechanical or enzymatic lysis steps showed an overall similar microbiota  
343 profiles (Lazarevic et al., 2013). A recent study also showed that saliva sample collection, storage  
344 and genomic DNA preparation with enzymatic-mechanical lysis does not significantly influence the  
345 salivary microbiome profiles (Lim et al., 2017). All samples in this study were lysed with an  
346 identical protocol including both enzymatic and mechanical disruption of microbial cells using  
347 bead-beating to reduce the bias may arise due to the lysis step.

348 The four saliva samples in triplicates analysed in MiSeq using the different protocols provided  
349 comparatively high sequencing coverage for the TS-tailed protocols (>10 k) and less for all other  
350 protocols (< 10 k). With current read length of 251 x 2 bp, the V3-V4 region of the rRNA gene is a  
351 possible target for sequencing (Mizrahi-Man et al., 2013), although satisfactory quality of the  
352 overlap of the forward and reverse paired-end reads may be challenging. However, extending the  
353 sequencing cycle up to 271 bp on the Illumina HiSeq platform provided ample overlap, and  
354 assembling these reads increases the reliability and quality in the overlapping region. In MiSeq,  
355 overall, 39% - 68% of the reads were discarded due to the low-quality score, unassembled pairs,  
356 assembled pairs with mismatched barcodes, minimum overlap length and archaeal or eukaryotic  
357 sequences. Quality trimming of the NX-tailed protocol sequence data discarded a lower number  
358 (6% -8%) of data though it yielded fewer sequences than the TS-tailed protocols. Protocols without  
359 internal index pairs gave comparatively high percent (>59 %) qualified for the OTU classification  
360 per sequence. Saliva samples amplicons processed with internal index pairs had lower OTU  
361 classification per sequence. Several studies have shown that high incidence of mismatching  
362 barcodes is a main loss factor in the microbiota sequencing studies (Degnan and Ochman, 2012;

363 Sinclair et al., 2015). This suggests that the fragment length is at the borderline of what will yield  
364 high quality sequence for the overlap between the read pairs and adding only a few extra base pairs  
365 to the fragment will reduce output quality. Whereas protocols with and without internal index pairs  
366 produced different sequence depth and quality data, all the protocols provided similar bacterial  
367 profiles for each samples. Studies have reported that, with the dual-index approach large number of  
368 samples can be sequenced using a number of primers equal to only twice the square root of the  
369 number of samples (Kozich et al., 2013). Dual indexing protocol is modified by adding the  
370 heterogeneity spacers to increase nucleotide diversity at the start of sequencing reads (Fadrosh et  
371 al., 2014). Dual indexing strategy further modified by adding third Illumina compatible index with  
372 variable length heterogeneity spacers to minimizes the need for PhiX spike-in (de Muinck et al.,  
373 2017). However, the advantage of dual index with internal index is to reduce the PCR amplification  
374 artefacts in high multiplex amplicon sequencing (Peng et al., 2015) and to reduce the cost of  
375 sequencing when the study includes a large sample size.

376 Our results show that low amounts of sequences usually correlate with low diversity. Our sample  
377 size was not large enough to conclude that low amounts of sequences was due to the quality or  
378 quantity of DNA, technical issues in the lab or difference in robustness of the methods. However,  
379 differences in yields using the same DNA, for example seen in sample 1a and 2b, suggest that  
380 protocol robustness may cause differences in sequencing yield (Supplementary Figure S6).  
381 Laboratory protocol, sequencing platform or error rate and bioinformatics approach can be reason  
382 for the majority of variability detected in microbiota studies (Salter et al., 2014; Sinha et al., 2015)  
383 but in our study all the protocols delivered overall similar profile of the microbes in the given saliva  
384 samples in triplicates. Three OTUs were explicitly assigned only to blank samples in HiSeq run.  
385 Negative control samples often yield contaminating bacterial species which may be due to  
386 contamination of bacterial DNA in the kits used (Salter et al., 2014). This study also reported that

387 the presence of contaminating sequences is dependent on the amount of biomass in the samples;  
388 however, we could not assess this in our samples.

389 Technical challenges have been reported in 16S rRNA amplicon sequencing, such as biases in  
390 estimation of population abundance in microbial communities due to the PCR primer selection,  
391 PCR template concentration and amplification conditions, pooling of multiple barcodes and  
392 sequencing. Hence, it is important to carefully interpret the experimental results from the technical  
393 replicates to validate the reproducibility of the methods (Wen et al., 2017). Average alpha-diversity  
394 indices for each samples in different protocols yielded comparatively similar profiles with one or  
395 two exception, which may due to the low sequence depth. We used the mixed-effect model-based  
396 ICC to quantify the reproducibility and stability of the Illumina MiSeq sequencing of saliva  
397 microbiome. ICC measures the variability among the multiple measurements for the same sample  
398 and assumes that the errors from different measurements have exactly the same statistical  
399 distributions and are indistinguishable from each other (Sinha et al., 2016). In our study, based on  
400 ICC, sequencing protocols using TS-tailed 2S protocol with and without internal index performed  
401 better than NX-tailed protocol and TS-tailed 1S protocols. The negative ICC values observed for all  
402 the NX-tailed protocol and TS-tailed 1S protocols may be due to high variation within a subject.

403 Saliva samples sequenced on HiSeq platform yielded high sequence depth ie; 48k – 398k  
404 sequences. Variation in technical replicates and low reproducibility, can be overcome by increasing  
405 the sequencing depth (Wen et al., 2017), obtainable by the HiSeq platform. Repeatability of the TS-  
406 tailed 1S method without internal index for nine control samples sequenced in HiSeq platform was  
407 given comparatively high alpha diversity and low variation (SD) among the samples. Alpha  
408 diversity was similar for the sample 4 sequencing repeated in MiSeq and HiSeq platform which  
409 support the repeatability of method TS-tailed without internal index as good protocol for  
410 microbiome studies. The major limitation of this study is the small number of samples tested for  
411 each method. However, we believe that, the number of samples and the depth of the sequencing is

412 sufficient to identify method that should not be used, and also indicate the preferred method to use  
413 in large scale studies.

414 In conclusion, NX-tailed 2S protocol and TS-tailed both 1S and 2S protocols were able to reproduce  
415 bacterial profiles for the samples sequenced, however, in our hands the reproducibility was  
416 comparatively highest for the TS-tailed 2S protocols without internal index on the MiSeq platform.  
417 Repeatability of the TS-tailed 1S protocol without internal dual index for nine control samples  
418 provided high alpha diversity and little variation among the samples. Considering the cost and time  
419 efficiency of using this simplified protocol with numerous barcodes suitable for the HiSeq platform,  
420 we suggest that the TS-tailed 1S method can be considered the most effective protocol for  
421 consistent quantification of bacterial profiles in saliva. Reproducibility and repeatability should be  
422 taken into consideration in design of a large-scale epidemiological study using saliva microbiota.

#### 423 **Acknowledgements**

424 We thank the individuals who participated in this study, and the FIMM biobank and FIMM tech  
425 centre. We also thank Timo Miettinen from FIMM tech centre for helping with the internal index  
426 setup. We also thank our group members for assisting with the fieldwork of the study Nina Jokinen,  
427 Jannina Viljakainen, Stephanie von Kraemer, and the scientific advisors' Dr Eva Roos and  
428 Professor Anna Elina Lehesjoki.

#### 429 **Ethics approval and consent to participate**

430 The study was approved by the regional Ethics Committee of the Hospital District of Helsinki and  
431 Uusimaa (169/13/03/00/10).

#### 432 **Availability of data and materials**

433 The datasets generated during the current study are available in the NCBI-SRA repository, with the  
434 accession number SRP117317.

#### 435 **Competing interests**

436 The authors have no potential conflicts of interest to declare.

#### 437 **Funding**

438 This work was supported by Folkhälsan Research Foundation; Academy of Finland [grant number  
439 250704]; Life and Health Medical Fund [grant number 1-23-28]; The Swedish Cultural Foundation  
440 in Finland [grant number 15/0897]; Signe and Ane Gyllenberg Foundation [grant number 37-1977-  
441 43]; and Yrjö Jahnsson Foundation [grant number 11486].

#### 442 **References**

- 443 Andersson, A.F., Lindberg, M., Jakobsson, H., Backhed, F., Nyren, P., Engstrand, L., 2008.  
444 Comparative analysis of human gut microbiota by barcoded pyrosequencing. *PLoS One* 3, e2836.  
445 <https://doi.org/10.1371/journal.pone.0002836>
- 446 Bartram, A.K., Lynch, M.D.J., Stearns, J.C., Moreno-Hagelsieb, G., Neufeld, J.D., 2011.  
447 Generation of multimillion-sequence 16S rRNA gene libraries from complex microbial  
448 communities by assembling paired-end Illumina reads. *Appl. Environ. Microbiol.* 77, 3846–3852.  
449 <https://doi.org/10.1128/AEM.02772-10>
- 450 Belstrøm, D., Holmstrup, P., Bardow, A., Kokaras, A., Fiehn, N.E., Paster, B.J., 2016. Temporal  
451 stability of the salivary microbiota in oral health. *PLoS One* 11, 1–9.  
452 <https://doi.org/10.1371/journal.pone.0147472>
- 453 Caporaso, J.G., Lauber, C.L., Walters, W.A., Berg-Lyons, D., Huntley, J., Fierer, N., Owens, S.M.,  
454 Betley, J., Fraser, L., Bauer, M., Gormley, N., Gilbert, J.A., Smith, G., Knight, R., 2012. Ultra-  
455 high-throughput microbial community analysis on the Illumina HiSeq and MiSeq platforms. *ISME*  
456 *J.* 6, 1621–1624. <https://doi.org/10.1038/ismej.2012.8>
- 457 Cho, I., Blaser, M.J., 2012. The human microbiome: at the interface of health and disease. *Nat. Rev.*  
458 *Genet.* 13, 260–270. <https://doi.org/10.1038/nrg3182>

- 459 Claesson, M.J., Wang, Q., O’Sullivan, O., Greene-Diniz, R., Cole, J.R., Ross, R.P., O’Toole, P.W.,  
460 2010. Comparison of two next-generation sequencing technologies for resolving highly complex  
461 microbiota composition using tandem variable 16S rRNA gene regions. *Nucleic Acids Res.* 38,  
462 e200. <https://doi.org/10.1093/nar/gkq873>
- 463 de Muinck, E.J., Trosvik, P., Gilfillan, G.D., Hov, J.R., Sundaram, A.Y.M., 2017. A novel ultra  
464 high-throughput 16S rRNA gene amplicon sequencing library preparation method for the Illumina  
465 HiSeq platform. *Microbiome* 5, 68. <https://doi.org/10.1186/s40168-017-0279-1>
- 466 Degnan, P.H., Ochman, H., 2012. Illumina-based analysis of microbial community diversity. *ISME*  
467 *J.* 6, 183–194. <https://doi.org/10.1038/ismej.2011.74>
- 468 Dewhirst, F.E., Chen, T., Izard, J., Paster, B.J., Tanner, A.C.R.R., Yu, W.H., Lakshmanan, A.,  
469 Wade, W.G., 2010. The human oral microbiome. *J. Bacteriol.* 192, 5002–5017.  
470 <https://doi.org/10.1128/JB.00542-10>
- 471 Ding, T., Schloss, P.D., 2014. Dynamics and associations of microbial community types across the  
472 human body. *Nature* 509, 357–60. <https://doi.org/10.1038/nature13178>
- 473 Edgar, R.C., Haas, B.J., Clemente, J.C., Quince, C., Knight, R., 2011. UCHIME improves  
474 sensitivity and speed of chimera detection. *Bioinformatics* 27, 2194–2200.  
475 <https://doi.org/10.1093/bioinformatics/btr381>
- 476 Fadrosch, D.W., Ma, B., Gajer, P., Sengamalay, N., Ott, S., Brotman, R.M., Ravel, J., 2014. An  
477 improved dual-indexing approach for multiplexed 16S rRNA gene sequencing on the Illumina  
478 MiSeq platform. *Microbiome* 2, 6. <https://doi.org/10.1186/2049-2618-2-6>
- 479 Gloor, G.B., Hummelen, R., Macklaim, J.M., Dickson, R.J., Fernandes, A.D., MacPhee, R., Reid,  
480 G., 2010. Microbiome profiling by illumina sequencing of combinatorial sequence-tagged PCR  
481 products. *PLoS One* 5. <https://doi.org/10.1371/journal.pone.0015406>



- 482 Haegeman, B., Hamelin, J., Moriarty, J., Neal, P., Dushoff, J., Weitz, J.S., 2013. Robust estimation  
483 of microbial diversity in theory and in practice. *ISME J.* 7, 1092–1101.  
484 <https://doi.org/10.1038/ismej.2013.10>
- 485 Hamady, M., Walker, J.J., Harris, J.K., Gold, N.J., Knight, R., 2008. Error-correcting barcoded  
486 primers for pyrosequencing hundreds of samples in multiplex. *Nat. Methods* 5, 235–237.  
487 <https://doi.org/10.1038/nmeth.1184>
- 488 Human Microbiome Project Consortium, 2012. Structure, function and diversity of the healthy  
489 human microbiome. *Nature* 486, 207–214. <https://doi.org/10.1038/nature11234>
- 490 Janem, W.F., Scannapieco, F.A., Sabharwal, A., Tsompana, M., Berman, H.A., Haase, E.M.,  
491 Miecznikowski, J.C., Mastrandrea, L.D., 2017. Salivary inflammatory markers and microbiome in  
492 normoglycemic lean and obese children compared to obese children with type 2 diabetes. *PLoS One*  
493 12, e0172647. <https://doi.org/10.1371/journal.pone.0172647>
- 494 Klindworth, A., Pruesse, E., Schweer, T., Peplies, J.J., Quast, C., Horn, M., Glockner, F.O.,  
495 Glockner, F.O., 2013. Evaluation of general 16S ribosomal RNA gene PCR primers for classical  
496 and next-generation sequencing-based diversity studies. *Nucleic Acids Res.* 41, e1.  
497 <https://doi.org/10.1093/nar/gks808>
- 498 Kozich, J.J., Westcott, S.L., Baxter, N.T., Highlander, S.K., Schloss, P.D., 2013. Development of a  
499 dual-index sequencing strategy and curation pipeline for analyzing amplicon sequence data on the  
500 miseq illumina sequencing platform. *Appl. Environ. Microbiol.* 79, 5112–5120.  
501 <https://doi.org/10.1128/AEM.01043-13>
- 502 Krishnan, K., Chen, T., Paster, B.J., 2017. A practical guide to the oral microbiome and its relation  
503 to health and disease. *Oral Dis.* 23, 276–286. <https://doi.org/10.1111/odi.12509>

- 504 Lane, D.J., Pace, B., Olsen, G.J., Stahl, D.A., Sogin, M.L., Pace, N.R., 1985. Rapid determination  
505 of 16S ribosomal RNA sequences for phylogenetic analyses. *Proc. Natl. Acad. Sci. U. S. A.* 82,  
506 6955–6959. <https://doi.org/10.1073/pnas.82.20.6955>
- 507 Lazarevic, V., Gaïa, N., Girard, M., François, P., Schrenzel, J., 2013. Comparison of DNA  
508 Extraction Methods in Analysis of Salivary Bacterial Communities. *PLoS One* 8.  
509 <https://doi.org/10.1371/journal.pone.0067699>
- 510 Li, J., Jia, H., Cai, X., Zhong, H., Feng, Q., Sunagawa, S., Arumugam, M., Kultima, J.R., Prifti, E.,  
511 Nielsen, T., Juncker, A.S., Manichanh, C., Chen, B., Zhang, W., Levenez, F., Wang, J., Xu, X.,  
512 Xiao, L., Liang, S., Zhang, D., Zhang, Z., Chen, W., Zhao, H., Al-Aama, J.Y., Edris, S., Yang, H.,  
513 Wang, J., Hansen, T., Nielsen, H.B., Brunak, S., Kristiansen, K., Guarner, F., Pedersen, O., Doré,  
514 J., Ehrlich, S.D., Pons, N., Le Chatelier, E., Batto, J.-M., Kennedy, S., Haimet, F., Winogradski, Y.,  
515 Pelletier, E., LePaslier, D., Artiguenave, F., Bruls, T., Weissenbach, J., Turner, K., Parkhill, J.,  
516 Antolin, M., Casellas, F., Borruel, N., Varela, E., Torrejon, A., Denariáz, G., Derrien, M., van  
517 Hylckama Vlieg, J.E.T., Viega, P., Oozeer, R., Knoll, J., Rescigno, M., Brechot, C., M'Rini, C.,  
518 Mérieux, A., Yamada, T., Tims, S., Zoetendal, E.G., Kleerebezem, M., de Vos, W.M., Cultrone, A.,  
519 Leclerc, M., Juste, C., Guedon, E., Delorme, C., Layec, S., Khaci, G., van de Guchte, M.,  
520 Vandemeulebrouck, G., Jamet, A., Dervyn, R., Sanchez, N., Blottière, H., Maguin, E., Renault, P.,  
521 Tap, J., Mende, D.R., Bork, P., Wang, J., 2014. An integrated catalog of reference genes in the  
522 human gut microbiome. *Nat. Biotechnol.* 32, 834–841. <https://doi.org/10.1038/nbt.2942>
- 523 Lim, Y., Totsika, M., Morrison, M., Punyadeera, C., 2017. The saliva microbiome profiles are  
524 minimally affected by collection method or DNA extraction protocols. *Sci. Rep.* 7, 8523.  
525 <https://doi.org/10.1038/s41598-017-07885-3>
- 526 Lozupone, C.A., Knight, R., 2008. Species divergence and the measurement of microbial diversity.  
527 *FEMS Microbiol. Rev.* <https://doi.org/10.1111/j.1574-6976.2008.00111.x>

- 528 McMurdie, P.J., Holmes, S., 2014. Waste Not, Want Not: Why Rarefying Microbiome Data Is  
529 Inadmissible. *PLoS Comput. Biol.* 10. <https://doi.org/10.1371/journal.pcbi.1003531>
- 530 Mizrahi-Man, O., Davenport, E.R., Gilad, Y., 2013. Taxonomic Classification of Bacterial 16S  
531 rRNA Genes Using Short Sequencing Reads: Evaluation of Effective Study Designs. *PLoS One* 8,  
532 e53608. <https://doi.org/10.1371/journal.pone.0053608>
- 533 Nicholson, J.K., Holmes, E., Kinross, J., Burcelin, R., Gibson, G., Jia, W., Pettersson, S., 2012.  
534 Host-Gut Microbiota Metabolic Interactions. *Science* (80-. ). 336, 1262–1267.  
535 <https://doi.org/10.1126/science.1223813>
- 536 Paster, B.J., Boches, S.K., Galvin, J.L., Ericson, R.E., Lau, C.N., Levanos, V.A., Sahasrabudhe, A.,  
537 Dewhirst, F.E., 2001. Bacterial diversity in human subgingival plaque. *J. Bacteriol.* 183, 3770–  
538 3783. <https://doi.org/10.1128/JB.183.12.3770-3783.2001>
- 539 Peng, Q., Vijaya Satya, R., Lewis, M., Randad, P., Wang, Y., 2015. Reducing amplification  
540 artifacts in high multiplex amplicon sequencing by using molecular barcodes. *BMC Genomics* 16,  
541 589. <https://doi.org/10.1186/s12864-015-1806-8>
- 542 Qin, J., Li, R., Raes, J., Arumugam, M., Burgdorf, S., Manichanh, C., Nielsen, T., Pons, N.,  
543 Yamada, T., Mende, D.R., Li, J., Xu, J., Li, S., Li, D., Cao, J., Wang, B., Liang, H., Zheng, H., Xie,  
544 Y., Tap, J., Lepage, P., Bertalan, M., Batto, J., Hansen, T., Paslier, D. Le, Linneberg, A., Nielsen,  
545 H.B., Pelletier, E., Renault, P., Zhou, Y., Li, Y., Zhang, X., Li, S., Qin, N., Yang, H., 2010. A  
546 human gut microbial gene catalog established by metagenomic sequencing. *Nature* 464, 59–65.  
547 <https://doi.org/10.1038/nature08821.A>
- 548 Quast, C., Pruesse, E., Yilmaz, P., Gerken, J., Schweer, T., Yarza, P., Peplies, J., Glöckner, F.O.,  
549 2012. The SILVA ribosomal RNA gene database project: improved data processing and web-based  
550 tools. *Nucleic Acids Res.* 41, D590–D596. <https://doi.org/10.1093/nar/gks1219>

- 551 Robinson, C.K., Brotman, R.M., Ravel, J., 2016. Intricacies of assessing the human microbiome in  
552 epidemiological studies. *Ann. Epidemiol.* 26, 311–321.  
553 <https://doi.org/10.1016/j.annepidem.2016.04.005>
- 554 Salonen, A., Nikkila, J., Jalanka-Tuovinen, J., Immonen, O., Rajilic-Stojanovic, M., Kekkonen,  
555 R.A., Palva, A., de Vos, W.M., 2010. Comparative analysis of fecal DNA extraction methods with  
556 phylogenetic microarray: effective recovery of bacterial and archaeal DNA using mechanical cell  
557 lysis. *J. Microbiol. Methods* 81, 127–134. <https://doi.org/10.1016/j.mimet.2010.02.007>
- 558 Salter, S.J., Cox, M.J., Turek, E.M., Calus, S.T., Cookson, W.O., Moffatt, M.F., Turner, P.,  
559 Parkhill, J., Loman, N.J., Walker, A.W., 2014. Reagent and laboratory contamination can critically  
560 impact sequence-based microbiome analyses. *BMC Biol.* 12, 87. [https://doi.org/10.1186/s12915-](https://doi.org/10.1186/s12915-014-0087-z)  
561 [014-0087-z](https://doi.org/10.1186/s12915-014-0087-z)
- 562 Santiago, A., Panda, S., Mengels, G., Martinez, X., Azpiroz, F., Dore, J., Guarner, F., Manichanh,  
563 C., 2014. Processing faecal samples: a step forward for standards in microbial community analysis.  
564 *BMC Microbiol.* 14, 112. <https://doi.org/10.1186/1471-2180-14-112>
- 565 Scheithauer, T.P.M., Dallinga-Thie, G.M., de Vos, W.M., Nieuwdorp, M., van Raalte, D.H., 2016.  
566 Causality of small and large intestinal microbiota in weight regulation and insulin resistance. *Mol.*  
567 *Metab.* 5, 1–12. <https://doi.org/10.1016/j.molmet.2016.06.002>
- 568 Schloss, P.D., Westcott, S.L., Ryabin, T., Hall, J.R., Hartmann, M., Hollister, E.B., Lesniewski,  
569 R.A., Oakley, B.B., Parks, D.H., Robinson, C.J., Sahl, J.W., Stres, B., Thallinger, G.G., Van Horn,  
570 D.J., Weber, C.F., 2009. Introducing mothur: Open-source, platform-independent, community-  
571 supported software for describing and comparing microbial communities. *Appl. Environ. Microbiol.*  
572 *75*, 7537–7541. <https://doi.org/10.1128/AEM.01541-09>

- 573 Sinclair, L., Osman, O.A., Bertilsson, S., Eiler, A., 2015. Microbial community composition and  
574 diversity via 16S rRNA gene amplicons: Evaluating the illumina platform. PLoS One 10, 1–18.  
575 <https://doi.org/10.1371/journal.pone.0116955>
- 576 Sinha, R., Abnet, C.C., White, O., Knight, R., Huttenhower, C., 2015. The microbiome quality  
577 control project: baseline study design and future directions. Genome Biol. 16, 276.  
578 <https://doi.org/10.1186/s13059-015-0841-8>
- 579 Sinha, R., Chen, J., Amir, A., Vogtmann, E., Shi, J., Inman, K.S., Flores, R., Sampson, J., Knight,  
580 R., Chia, N., 2016. Collecting fecal samples for microbiome analyses in epidemiology studies.  
581 Cancer Epidemiol. Biomarkers Prev. 25, 407–416. <https://doi.org/10.1158/1055-9965.EPI-15-0951>
- 582 Tringe, S.G., Hugenholtz, P., 2008. A renaissance for the pioneering 16S rRNA gene. Curr. Opin.  
583 Microbiol. 11, 442–446. <https://doi.org/10.1016/j.mib.2008.09.011>
- 584 van Nood, E., Vrieze, A., Nieuwdorp, M., Fuentes, S., Zoetendal, E.G., de Vos, W.M., Visser, C.E.,  
585 Kuijper, E.J., Bartelsman, J.F.W.M., Tijssen, J.G.P., Speelman, P., Dijkgraaf, M.G.W., Keller, J.J.,  
586 2013. Duodenal Infusion of Donor Feces for Recurrent *Clostridium difficile*. N. Engl. J. Med. 368,  
587 407–415. <https://doi.org/10.1056/NEJMoa1205037>
- 588 Wen, C., Wu, L., Qin, Y., Van Nostrand, J.D., Ning, D., Sun, B., Xue, K., Liu, F., Deng, Y., Liang,  
589 Y., Zhou, J., 2017. Evaluation of the reproducibility of amplicon sequencing with Illumina MiSeq  
590 platform. PLoS One 12, e0176716. <https://doi.org/10.1371/journal.pone.0176716>
- 591 Wilkinson, L., 2011. ggplot2: Elegant Graphics for Data Analysis by WICKHAM, H. Biometrics  
592 67, 678–679. <https://doi.org/10.1111/j.1541-0420.2011.01616.x>
- 593 Yuan, S., Cohen, D.B., Ravel, J., Abdo, Z., Forney, L.J., 2012. Evaluation of Methods for the  
594 Extraction and Purification of DNA from the Human Microbiome. PLoS One 7, e33865.  
595 <https://doi.org/10.1371/journal.pone.0033865>

596 Zheng, W., Tsompana, M., Ruscitto, A., Sharma, A., Genco, R., Sun, Y., Buck, M.J., 2015. An  
597 accurate and efficient experimental approach for characterization of the complex oral microbiota.  
598 *Microbiome* 3, 48. <https://doi.org/10.1186/s40168-015-0110-9>

599 Zhou, H.-W., Li, D.-F., Tam, N.F.-Y., Jiang, X.-T., Zhang, H., Sheng, H.-F., Qin, J., Liu, X., Zou,  
600 F., 2011. BIPES, a cost-effective high-throughput method for assessing microbial diversity. *ISME*  
601 *J.* 5, 741–749. <https://doi.org/10.1038/ismej.2010.160>

602

603

604

605

606

607

608

609

610

611

612

613

614

615

616

617

618
